1        **Successful suppression of a field population of *Ae. aegypti* mosquitoes using a**  
2        **novel biological vector control strategy is associated with significantly lower**  
3        **incidence of dengue**

4  
5        **Short title: First direct demonstration of prevention of dengue using SIT**

6  
7        Lisiane C Poncio<sup>1</sup>, Filipe A dos Anjos<sup>1</sup>, Deborah A de Oliveira<sup>1</sup>, Débora Rebechi<sup>1</sup>, Rodrigo N de  
8        Oliveira<sup>1</sup>, Rodrigo F Chitolina<sup>1</sup>, Marise L Fermino<sup>1,2</sup>, Luciano G Bernardes<sup>3</sup>, Danton Guimarães<sup>4</sup>,  
9        Pedro A Lemos<sup>5</sup>, Marcelo N E Silva<sup>6</sup>, Rodrigo G M Silvestre<sup>7,8</sup>, Emerson S Bernardes<sup>1,9</sup>, Nitzan  
10        Paldi<sup>10\*</sup>

11  
12        <sup>1</sup>Forrest Brasil Tecnologia Ltda, Araucaria, PR, Brazil

13        <sup>2</sup>Faculty of Health Sciences of Barretos Dr. Paulo Prata, Barretos, SP, Brazil

14        <sup>3</sup>Paraná Institute of Technology, Curitiba, PR, Brazil

15        <sup>4</sup>Sanitary Surveillance of Jacarezinho Municipal Health Department, Jacarezinho, PR, Brazil

16        <sup>5</sup>Epidemiologic Surveillance of Jacarezinho Municipal Health Department, Jacarezinho, PR, Brazil

17        <sup>6</sup>Health Department of Jacarezinho, Jacarezinho, PR, Brazil

18        <sup>7</sup>UniSociesc, Curitiba, PR, Brazil

19        <sup>8</sup>University of São Paulo, São Paulo, SP, Brazil

20        <sup>9</sup>Department of Radiopharmacy, Nuclear Energy Research Institute, Radiopharmacy Center, São  
21        Paulo, SP, Brazil.

22        <sup>10</sup>Forrest Innovations Ltd, Caesarea, Israel

23  
24        \*Corresponding author:

25        Email: [nitzan@forrestinnovations.com](mailto:nitzan@forrestinnovations.com)

28 **Abstract**

29

30 **Background.** Despite extensive efforts to prevent recurrent *Aedes*-borne arbovirus epidemics, there  
31 is a steady rise in their global incidence. Vaccines/treatments show very limited efficacy and  
32 together with the emergence of mosquito resistance to insecticides, it has become urgent to develop  
33 alternative solutions for efficient, sustainable and environmentally benign mosquito vector control.  
34 Here we present a new Sterile Insect Technology (SIT)-based program that uses large-scale releases  
35 of sterile male mosquitoes produced by a highly effective, safe and environmentally benign method.

36 **Methods and findings.** To test the efficacy of this approach, a field trial was conducted in a Brazilian  
37 city (Jacarezinho), which presented a history of 3 epidemics of dengue in the past decade. Sterile  
38 male mosquitoes were produced from a locally acquired *Aedes aegypti* colony, and releases were  
39 carried out on a weekly basis for seven months in a predefined area. This treated area was matched to  
40 a control area, in terms of size, layout, historic mosquito infestation index, socioeconomic patterns  
41 and comparable prevalence of dengue cases in past outbreaks. Releases of sterile male mosquitoes  
42 resulted in up to 91.4% reduction of live progeny of field *Ae. aegypti* mosquitoes recorded over time.  
43 The reduction in the mosquito population was corroborated by the standard monitoring system  
44 (LIRAA index) as determined by the local municipality, which found that our treated neighborhoods  
45 were almost free of *Ae. aegypti* mosquitoes after 5 months of release, whereas neighborhoods  
46 adjacent to the treated area and the control neighborhoods were highly infested. Importantly, when a  
47 dengue outbreak started in Jacarezinho in March 2019, the effective mosquito population  
48 suppression was shown to be associated with a far lower incidence of dengue in the treated area (16  
49 cases corresponding to 264 cases per 100,000 inhabitants) almost 16 times lower than the dengue  
50 incidence in the control area (198 cases corresponding to 4,360 dengue cases per 100,000  
51 inhabitants).

52 **Conclusions.** Our data present the first demonstration that a SIT-based intervention has the potential  
53 to prevent the spread of dengue, opening exciting new opportunities for preventing mosquito-borne  
54 disease.

## 55 **Introduction**

56 Mosquito-transmitted arboviruses are the cause of substantial human mortality and morbidity.  
57 Dengue is endemic in more than 100 countries in Africa, the Americas, the Eastern Mediterranean,  
58 Southeast Asia and the Western Pacific [1]. An estimated 500,000 people with severe dengue require  
59 hospitalization each year, a large proportion of whom are children [2]. The symptoms of dengue  
60 include high fever, severe headaches, muscle and joint pain, nausea, vomiting, swollen glands or rash  
61 [3]. Dengue itself is rarely fatal, but severe dengue is a potentially fatal complication, with symptoms  
62 including low temperature, severe abdominal pains, rapid breathing, bleeding gums and blood in  
63 vomit [2].

64 Although the World Health Organization (WHO) has announced its intention to target  
65 reduction of global incidence of dengue by 75% in the next decade [2], the apparent reality seems to  
66 be heading in the opposite direction [4]. Indeed, hyper-urbanization and climate change are driving  
67 the expanded range of the primary mosquito vector of dengue and other arboviruses [5–7].  
68 Consequently, the high morbidity and consequent economic and resource burden on health services  
69 in endemic settings is substantial and increasing [1].

70 Since specific vaccines to arboviruses have been presenting very limited efficacy and no  
71 treatments are available other than management [8], the main strategy to prevent the outbreak of  
72 epidemics still remains the control of the mosquito vectors, with the *Ae. aegypti* mosquito being by  
73 far the most common and efficient vector of dengue [9]. However, the traditional methods of vector  
74 control, such as the mechanical removal of potential breeding sites for mosquitoes and the use of  
75 insecticides [10], have been shown to be insufficient to prevent disease outbreaks, as has been

76 evidenced by the continued rise of dengue incidence [4]. This has created an urgent need for  
77 alternative solutions to vector control.

78 Several biological paradigms for efficient *Ae. aegypti* control have created an interest both in  
79 the scientific and public-health communities over the past few years. One of these is the Sterile  
80 Insect Technique (SIT), which is based on the massive and continuous release of sterile male  
81 mosquitoes that mate with the wild females. Subsequently, these females do not generate viable  
82 offspring, which results in the gradual reduction of the local mosquito population [11]. As a method  
83 of insect control, SIT has several fundamental advantages, the most important of which is that, by  
84 definition, it provides species-level specificity, with no off-target effects [12]. In addition, another  
85 advantage of SIT programs is that there is virtually no risk of selecting resistant mosquito  
86 populations, which is one of the main criticisms related to chemical control (insecticides) [10].

87 Several SIT-based vector programs have already been shown to suppress mosquito  
88 populations in field studies [13–15]. Although SIT programs for vector control are well-known in the  
89 scientific community for many years [11], there are several fundamental limitations that preclude  
90 their wide implementation. The sterilization of mosquitoes by irradiation, for example, decreases  
91 competitiveness capacity of male mosquitoes [11]. The use of genetically modified (GM)  
92 mosquitoes is often shunned by the population and governments, due in part to fear of gene flow  
93 from released GM mosquitoes into the local gene pool [16]. Also, the technique based on  
94 cytoplasmic incompatibility (Incompatible Insect Technology – IIT), which utilizes mosquitoes  
95 infected with *Wolbachia* bacteria, seems to present several vulnerabilities, including the reduced  
96 competitiveness induced by some *Wolbachia* strains, risk of population replacement, selection of  
97 virus resistant to *Wolbachia*, and also limitations related to scaling up [13,17,18]. Above all, no such  
98 program has ever been able to directly demonstrate prevention of the spread of dengue or other  
99 arboviruses [13–15].

100           Herein we present a new and environmentally benign vector control intervention. This  
101 intervention comprised a series of actions implemented over one year in a Brazilian town  
102 (Jacarezinho) and included releases of sterile male mosquitoes (Natural Vector Control Mosquitoes-  
103 NVC) produced from the locally acquired *Ae. aegypti* mosquito population. The results of this  
104 intervention offered the first evidence that a SIT vector-control program can dramatically reduce the  
105 spread of dengue.

106

## 107 **Methods**

### 108 **Establishment of local *Ae. aegypti* mosquito colony**

109           *Ae. aegypti* mosquitoes from Jacarezinho were obtained via a field collection of eggs from the  
110 *Aedes* genus, using ovitraps distributed in several locations in the city of Jacarezinho in 2017. *Ae.*  
111 *aegypti* males and females from this F0 generation were mated and the females could individually  
112 lay their eggs. Then, all females that laid eggs from this F0 generation were collected and analyzed  
113 for the presence of dengue, Zika and chikungunya viruses, using a Real-time PCR method  
114 (Multiplex Dengue, Chikungunya, Zika virus, Genesig, USA). No infected females were detected  
115 and the eggs from these confirmed pathogen-free females were used to establish the mosquito colony  
116 of the Jacarezinho strain.

117           All the mosquitoes used in the study were reared in the Insectary of Forrest Brasil Tecnologia  
118 Ltda. located in Araucária city, in the state of Paraná, Brazil, and following all the biosafety  
119 parameters required for the process as defined by Environmental Institute of Paraná (IAP). The basic  
120 mosquito growth protocol and massive production of eggs was based on Rutledge et al. 1964 [19],  
121 with modifications. Briefly, freshly hatched larvae were placed in rearing trays and fed with  
122 commercially available alevin fish food (Supra Alevino), according to a predetermined regime to  
123 enable similar development for all production batches. Adult mosquitoes were fed on 10% sugar  
124 solution and kept at 26-28°C, 70-80% relative humidity and a 12:12 photoperiod. For massive

125 production of eggs, adult females were mated with male mosquitoes (3 females: 1 male ratio) for  
126 three days and then fed with defibrinated sheep blood (Laborclin) using artificial feeders.

127

## 128 **Production of NVC sterile male mosquitoes**

129 NVC mosquitoes were produced using a method that incorporates the use at the larval stage  
130 of specific dsRNAs, which targets the gene AAEL013723-PA, encoding a polypyrimidine tract  
131 binding protein (PTB) [20] and treatment with thiotepa at the pupal stage.

132 NVC sterile male mosquitoes used in all the experiments that were conducted under  
133 laboratory and semi-field conditions were produced as follows; the production process started by  
134 hatching *Ae. aegypti* eggs in 3 L dechlorinated water containing 150 mL of aged water and 0.15 mg  
135 fish food /ml at 26° - 26,5°C, for an overnight period. Subsequently, groups of one hundred first  
136 instar larvae were treated with a food formulation containing 1 mg of PTB-1 dsRNA (Table 1), 120  
137 mg of yeast and 60 mg of fish food encapsulated in 1.2% (W/V) of sodium alginate particles. Larvae  
138 were fed with this formulation until they reached the third instar development phase. Then, third  
139 instar larvae were fed until the pupal stage with a second formulation, composed of 10 µg/mL of  
140 PTB-2 dsRNA (Table 1), 450 µL of PEG 20% (Polyethylene glycol 4000, Sigma), 200 µL of 0.01  
141 g/mL Chitosan and 180 mg of Bovine Liver Powder encapsulated in 1.2 % (W/V) sodium alginate  
142 particles. To complete the sterilization process, a final step was performed after mechanical sorting  
143 of male and female pupae (Larval-Pupal Separator, Model 5412, John W. Hock Company, Florida,  
144 USA). Females were discarded, and males were kept in a 0.1% thiotepa solution, overnight, then  
145 extensively washed in acidified water (pH 3). Male pupae were finally placed in cages to emerge.

146

147

148 **Table 1. Primer sequences used to synthesize dsRNA sequences used to silence the PTB gene**  
149 **(AAEL013723-PA)**

| Tiles | Primer sequences with T7 promoter sequences* | dsRNA sequence |
|-------|----------------------------------------------|----------------|
|-------|----------------------------------------------|----------------|

|                        |                      |                                                       |                                                                                                                                                                                                                                                                                                                                                  |
|------------------------|----------------------|-------------------------------------------------------|--------------------------------------------------------------------------------------------------------------------------------------------------------------------------------------------------------------------------------------------------------------------------------------------------------------------------------------------------|
| <b>PTB-1<br/>dsRNA</b> | PTB-1-T7-<br>Forward | AATACGACTCACTATAGGG<br>AGAATCGTTCGAGTCGCTACT<br>GTACC | TTGACAAGGCGATGATTGTCTACGATGCCAAGACGA<br>AGGTTTCCCGAGGGTTCGGATTTCGTGTACTTCCAGG<br>AGCAGAGTGC GGCCACCGAAGCCAAAATGCAGTGT<br>AATGGAATGATGCTGCATGAGCGCACGATTAGAGTG<br>GATTATTCCGGTGACCGAAAAGACCGCATAACGCCACG<br>CCCGGTGTCTACATGGGAGCTAGAAGCACTGAGAAA<br>CGGAAGCACCGCAGT                                                                               |
|                        | PTB-1-T7-<br>Reverse | TAATACGACTCACTATAGG<br>GAGAGGCGTTGCTAAGCCG<br>TTCAC   |                                                                                                                                                                                                                                                                                                                                                  |
| <b>PTB-2<br/>dsRNA</b> | PTB-2-T7-<br>Forward | TAATACGACTCACTATAGG<br>GATACGCACAGAACCCGC             | ACGCACAGAAACCCGCTTCATCGGTTCAAGAAGCCCG<br>GCAGCAAAAACCTACCAGAACATCTATCCACCGTCTG<br>CCACTGCATTTAAGCAACATTCAGCTACCGTCA<br>CCGAGGAGGAGATTAAAGAAGCCTTCACCAAAAAC<br>GGCTTCGAAGTCAAAGCTTTCAAATTTTTCCCAAG<br>GACCACAAGATGGCTCTGATACAGCTCAGCTCGATC<br>GAGGAAGCCGTGTGCGCGCTGATCAAGATGCACAA<br>CTACCAGCTCTCGGAATCGAACCATCTACGTGTCTAG<br>TTTTTCCAAATCCAACATC |
|                        | PTB-2-T7-<br>Reverse | TAATACGACTCACTATAGG<br>GATTTAGATGTTGGATTT             |                                                                                                                                                                                                                                                                                                                                                  |

150 \* Both dsRNA sequences used in this study were either produced internally by *in vitro* transcription  
151 (Megascript kit, Ambion) or provided by AgroRNA (Seoul, Korea).

152 For the field trial, NVC male mosquitoes were produced essentially as described above, with  
153 several modifications necessary to adapt the protocol for large-scale production. These modifications  
154 included the higher number of larvae treated per batch and the reduction of dsRNA concentration  
155 during the first phase of NVC male mosquito production. In the pupae phase, males and females  
156 were mechanically sorted as described above, and all the batches of NVC production underwent a  
157 quality control to detect the potential presence of contaminating females. For this, a sample of at  
158 least 1,000 individuals was collected and analyzed under 10x magnification. A minimum threshold  
159 for pupal sorting accuracy of 99.8% males per group was imposed. All the batches of NVC pupae  
160 below this value was re-sorted until it was above 99.8%. Finally, approved batches of male pupae  
161 were subjected to thiotepa treatment. For large-scale production, the time of exposure of male pupae  
162 to thiotepa solution (at 0.6% W/V) was reduced to 2.5 hours, to avoid adult emergence during this  
163 step of treatment. Subsequently, thiotepa-treated NVC mosquitoes underwent three steps of washes  
164 to remove and inactivate any remnants of thiotepa solution that might stick to the outer surface of the  
165 pupae [21]: the first with tap water (for 10 min); the second with 0.0025 N H<sub>2</sub>SO<sub>4</sub> solution at pH 2-3  
166 (for 10 minutes) and the third and last one with 1 mM NaOH solution at pH 9 (for 20 minutes). This  
167 final step ensures complete degradation of thiotepa and derivatives into inert and non-toxic  
168 compounds [21]. Finally, pupae were rinsed in water to remove traces of the alkaline solution and

169 then transferred to a container within the adult cage to emerge. After emerging as adults, NVC sterile  
170 male mosquitoes were fed 10% sugar solution.

171

## 172 **Fertility bioassay**

173 To demonstrate the fertility status and competitiveness of NVC mosquitoes under laboratory  
174 conditions, NVC male mosquitoes (treated group) and untreated male mosquitoes (control group)  
175 were mated with virgin (fertile) females in the ratio of 1:3 (one male to three females). To test the  
176 competitiveness capacity of NVC mosquitoes, NVC males were allowed to mate with virgin females  
177 in the presence or absence of different proportions regular non-NVC males, according to the  
178 following experimental groups: fertile control (ten untreated virgin females and ten untreated males);  
179 sterile control (ten untreated virgin females and ten NVC treated mosquitoes); ratio 1:1 (ten  
180 untreated virgin females with five NVC and five untreated males) and ratio 10:1 (ten untreated virgin  
181 females with nine NVC and one untreated males). Three replicates from each group were prepared.  
182 Males and females were kept in the cage for a period of three to five days to allow mating.

183 Following the period for mating, females (from both fertility and competitiveness assays)  
184 were submitted to the steps of blood feeding, oviposition, embryonic development, hatching and  
185 counting. Details of the protocol can be found in the supplementary information (appendix S1).

186

## 187 **Semi-field trial**

188 A semi-field experiment was carried out to test NVC male mosquitoes' ability to compete  
189 with the wild male mosquitoes in ambient settings. The experiment was performed using a cage  
190 system that allowed mosquitoes to be exposed to local environmental conditions (temperature and  
191 humidity) but, at the same time, kept them in a biosafety environment so they would not be released  
192 into the wild. This experiment was performed in the city of Jacarezinho. Details of cage system can  
193 be found in appendix S2.



194 For the competitiveness assays, NVC mosquitoes were allowed to mate with virgin females  
195 inside the semi-field cages in the presence or absence of different proportions of normal males,  
196 according to the following experimental groups: fertile control (fertile males only); sterile control  
197 (sterile males only); ratio 1:1 (equal proportions of sterile and fertile males); ratio 10:1 (10 sterile  
198 males per 1 fertile male). The distribution of each of the groups of the experiment was performed in  
199 a random manner, using an Excel randomization worksheet. At the time of adult release, male  
200 mosquitoes were released before females. Only after all males were released, the females were  
201 released into the cages. Males and females were allowed to mate for a period of three days.

202 After the three-day mating period, a blood meal was provided for each semi-field cage. For  
203 this, three anesthetized mice were kept in each semi-field cage for a one-hour period, then all mice  
204 used were euthanized by anesthetic over-dose. All mice used in the experiments were provided by  
205 the Paraná Institute of Technology (TECPAR), after approval by the Local Ethics Committee  
206 (appendix S3). Three days after blood feeding, five ovitraps were placed inside each cage [22,23].  
207 Females were allowed to oviposit for a period of five days, then, ovitraps were collected and  
208 transferred to the laboratory. Eggs were dried for five days to allow embryonic development and  
209 counted. Finally, eggs were hatched to verify the percentage of viable larvae. For this purpose, each  
210 paddle from each semi-field cage was kept in a tray with 2 L of water for 48 hours, then, hatched  
211 larvae were counted. The percentage of hatching was calculated based in the total number of eggs  
212 and viable larvae.

213

#### 214 **Study location of field trial**

215 Jacarezinho is a city in the northern region of Paraná state, located in southern Brazil (Figure  
216 1A). Jacarezinho has a temperate climate, with well distributed rainfall throughout the year, and a  
217 mean annual precipitation of 1376 mm. The warmest and wettest month is January (average  
218 temperature of 25°C and 187 mm of precipitation), the coldest and driest month is June (average

219 temperature of 17°C and 50 mm of precipitation) and the average temperature is 21°C. The study  
220 areas in Jacarezinho were chosen based on *Ae. aegypti* infestation rates and historical dengue  
221 epidemics, provided on a regular basis by the State Health Department of Paraná. Control and treated  
222 areas displayed similar number of inhabitants and socioeconomic characteristics, based on  
223 demographic data provided by the local municipality. Priority was given to neighborhoods with the  
224 highest historical rate of mosquito infestation and occurrence of dengue in past outbreaks. The  
225 control area was comprised of three neighborhoods which, together, correspond to an area of 81  
226 hectares and have approximately 4,500 inhabitants. The treated area was also comprised of three  
227 neighborhoods with 77 hectares in total and approximately 6,000 inhabitants. As shown in Figure  
228 1A, the areas chosen are separated by almost 4 km. To facilitate the releases of NVC mosquitoes and  
229 monitoring, the treated area was subdivided into three sub-regions (A, B and C) and microregions  
230 (Figure 1B).

231

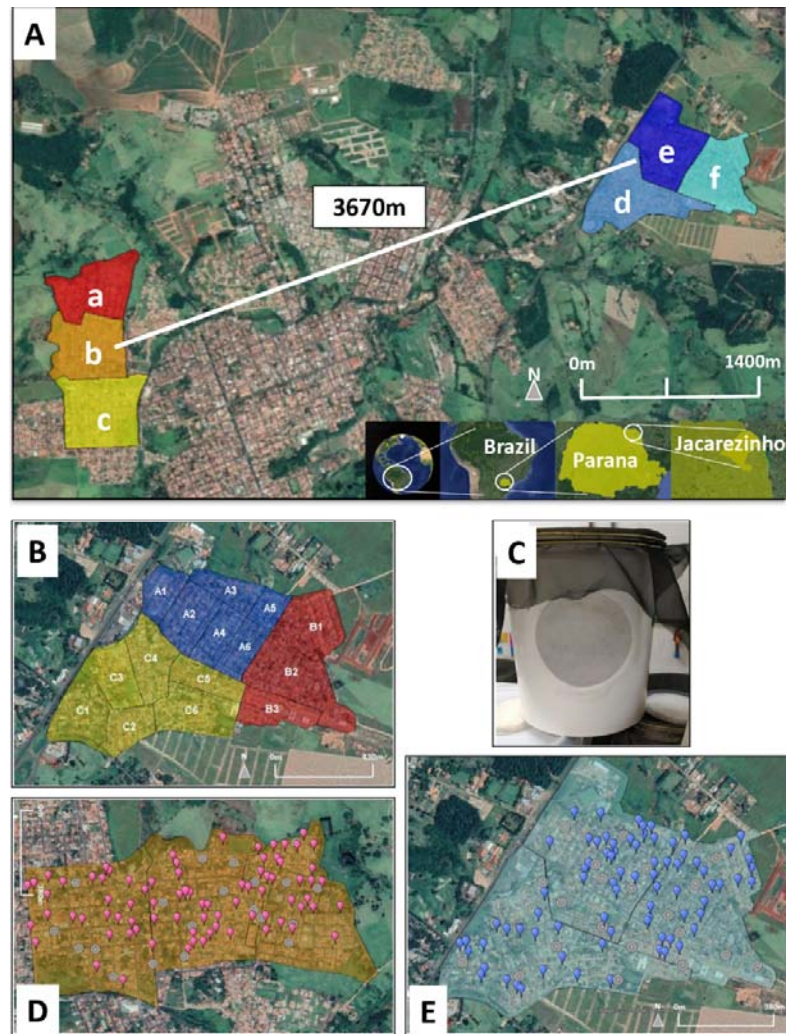

232

233 **Figure 1. Satellite image (map data April 2019: Google, USA) showing the location of the study**

234 **areas in Jacarezinho, South of Brazil. A.** Map of Jacarezinho urban area and surroundings,

235 showing the control and treated areas. The three neighborhoods chosen for the control Area (a-Dom

236 Pedro Filipack, b-Vila Maria and c-Vila São Pedro) is shown on the left and neighborhoods chosen

237 as the treated area (d-Vila Leão, e-Aeroporto and f-Novo Aeroporto) are shown on the right.

238 Municipality of Jacarezinho, Paraná state, Brazil. **B.** The treated area was divided in microregions a,

239 b and c. **C.** The cage where NVC mosquitoes were packed before releases. **D.** Map of control area

240 showing the points where ovitraps (pink marks) were installed. **E.** Map of the treated area showing

241 the location of the ovitraps (blue marks).

242

243 **NVC mosquito releases, *Ae. aegypti* surveillance and viable progeny**

244         Seven-day-old NVC male mosquitoes were packed in cylindrical plastic containers (4.2L of  
245 capacity, 210 mm height, 184 mm diameter, Figure 1C), at a maximum of 4,000 per container, and  
246 were fed with sugar solution until release. Mosquito releases were performed by manually opening  
247 the containers as a car goes through the streets of the treated area, according to the release schedule  
248 of the week. The number of NVC male mosquitoes released in each microregion were defined based  
249 on the monitoring of eggs collected in these areas in the previous week.

250         The monitoring of *Ae. aegypti* abundance was performed through the weekly installation of  
251 100 ovitraps [22,23] in the houses or in the peridomiciliar area of the residences of both treated and  
252 control area. The selection of houses for the installation of ovitraps was performed in a random way.  
253 For this, all the houses from control and treated areas received numbering and a draw was  
254 performed, following the LIRAA methodology [24]. At least one resident of each house used for the  
255 traps signed a consent form that allowed ovitraps to be installed in their home (appendix S4).  
256 Ovitrap were installed and kept in the field for a period of 7 days, then removed to the laboratory  
257 and replaced with new ones. Once at the laboratory, eggs collected in each ovitrap were air dried for  
258 five days to complete the embryological development. Eggs were counted, and the hatching was  
259 performed by individually immersing each wooden paddle in a 0.0175% (W/V) solution of fish meal  
260 diluted in filtered water. The eggs were kept in this solution for 48 hours and then the larvae that  
261 hatched in this period were counted and considered viable progeny.

262         To monitor the abundance of *Aedes* genus population in Jacarezinho, prior to the period of  
263 NVC releases, ovitraps were installed in 52 points distributed throughout the town and replaced  
264 weekly. The eggs from each ovitrap were hatched together and larvae were reared to adulthood.  
265 Adult mosquitoes were then identified by species.

266

267 **Entomological and epidemiological data**

268 Where indicated, official *Ae. aegypti* infestation data was provided by the Sanitary  
269 Surveillance of the Health Department of Jacarezinho according to *Ae. aegypti* Infestation Index  
270 Rapid Survey (LIRAA). This method was developed by the Brazilian Ministry of Health and consists  
271 of bimonthly larval sampling of *Ae. aegypti* in predetermined survey points, which are a function of  
272 the human population density and the number of existing buildings in the city [24]. LIRAA index is  
273 expressed as percentage of analyzed buildings where *Ae. aegypti* larvae are found. LIRAA index  
274 below 1% classify the area surveyed as satisfactory; LIRAA between 1% and 3.9%, the situation is  
275 defined as "alert" and LIRAA index above 4% indicates a risk of a dengue outbreak.

276 Epidemiological data regarding dengue cases in Jacarezinho was provided by the  
277 Epidemiological Surveillance of the Health Department of Jacarezinho. All the patients presenting  
278 dengue symptoms were reported to the local authority responsible. Subsequently, dengue rapid test  
279 (ELISA method, detection of NS1 using both IgM and IgG) was applied to each and every of these  
280 patients, to confirm (or not) the dengue diagnosis. In parallel, a blood sample from each patient was  
281 collected and analyzed by the Central Laboratory of Paraná State (LACEN), the regional authority,  
282 for further analysis using RT - PCR MULTIPLEX and dengue serological identification.

283

#### 284 **Analysis of field population suppression and statistics**

285 Estimation of field population suppression was performed as previously described in Gorman  
286 et al., 2015 [25], with modifications. Weekly moving averages relative to the same period at each  
287 control area were calculated according to the equation  $M = (T_a/C_a)/(T_b/C_b) - 1$ , where M is the  
288 population change,  $T_a$  is mean larvae per point in the treated area after release,  $C_a$  is mean larvae per  
289 point in control area after release;  $T_b$  is mean larvae per point in treated area before release and  $C_b$  is  
290 mean larvae per point in control area before release. This was done by comparing data obtained  
291 weekly against baseline data obtained across the three weeks prior to the beginning of releases. The  
292 corresponding 95% confidence intervals (CIs) were calculated by a 10,000-loop bootstrap for each

293 period [25]. The CIs were calculated for the entire period of releases and for each period of seven  
294 weeks. The CIs were established in R version 3.5.2 (2018-12-20) (Copyright © 2018 The R  
295 foundation for Statistical Computing).

296 Analysis of Covariance (ANCOVA) using R version 3.5.2 was performed to verify the  
297 difference of viable progenies between control and treated areas over the study period. For this 29  
298 weekly means of viable progeny by trap for both areas were calculated in the period when releases  
299 occurred.

300 Dengue incidence from March to May 2019 ((number of Dengue cases/exposed population of  
301 the area) X 100,000) were calculated for control ( $I_{DC}$ ) and treated ( $I_{DT}$ ) areas. The rate ratio (RR) is  
302 the ratio between the two incidences and was calculated by using the formula  $RR=I_{DT}/I_{DC}$ . Values of  
303  $RR<1$  indicate that the intervention (in this case, NVC treatment) is protective against Dengue and  
304 values of  $RR>1$  indicate that intervention is a worsening factor for Dengue. Confidence intervals  
305 95% were established in R software. ANCOVA was also used to analyze the differences between  
306 Dengue cases originated in control and treated areas.

307 To support the correlation between dengue cases, the mean of eggs and larvae progeny in  
308 each area, a linear regression was performed. Correlation was established based on the accumulated  
309 dengue cases that occurred in each area, compared to the sum of weekly mean of eggs collected and  
310 the weekly mean of viable larvae, to compare this variable, the number of dengue cases was paired  
311 with the data of eggs or viable larvae from 3 weeks before the dengue case was registered. This  
312 analysis was performed from the first week after the NVC releases started in the treated area and  
313 proceed until the end of field surveillance.

314 In addition, to better evaluate the influence of treatment and the number of viable larvae  
315 progenies on the total number of cases during the NVC releases, a Multivariate Anova was  
316 performed in R software. Both study areas were split to the three main neighborhoods in each region.  
317 Based on the 29 weeks of NVC releases, a mean of viable progeny per trap for each neighborhood

318 was established and the total number of dengue cases for each neighborhood was calculated. Results  
319 were considered significant when p values were smaller than 0.05.

320

## 321 **Results**

### 322 **Sterility of NVC male mosquitoes does not affect their competitiveness capacity**

323 One of the problems of SIT is related to the method of sterilization of male insects, since  
324 several of the available techniques potentially affects the fitness of mosquitos and compromises their  
325 competitiveness capacity. To evaluate the impact of sterilization in NVC males, laboratory and semi-  
326 field tests were conducted to demonstrate the sterility and competitiveness of NVC mosquitoes. The  
327 laboratory-scale fertility bioassay using NVC male mosquitoes showed that they are unable to  
328 generate viable offspring after copulating with virgin females reared under similar conditions (Figure  
329 2A and 2B). Although these results suggested that NVC are sterile, it is possible that this outcome is  
330 due to an inability of male mosquitoes to mate with females. Therefore, additional tests were  
331 performed to evaluate the ability of NVC to copulate and compete with normal fertile mosquitoes.  
332 As shown in Figure 2C and 2D, NVC male mosquitoes are able to compete with wild males when  
333 subjected to competitive assays using different ratios of sterile males to fertile males. To demonstrate  
334 that NVC mosquitoes were also competitive when exposed to field environmental conditions, a  
335 semi-field trial was conducted in the city of Jacarezinho. The results show that NVC mosquitoes  
336 were equally competitive with non-sterile mosquitoes under semi-field environmental conditions and  
337 proportionally suppressed the viable progeny of the next generation (Figure 2E and 2F).

338

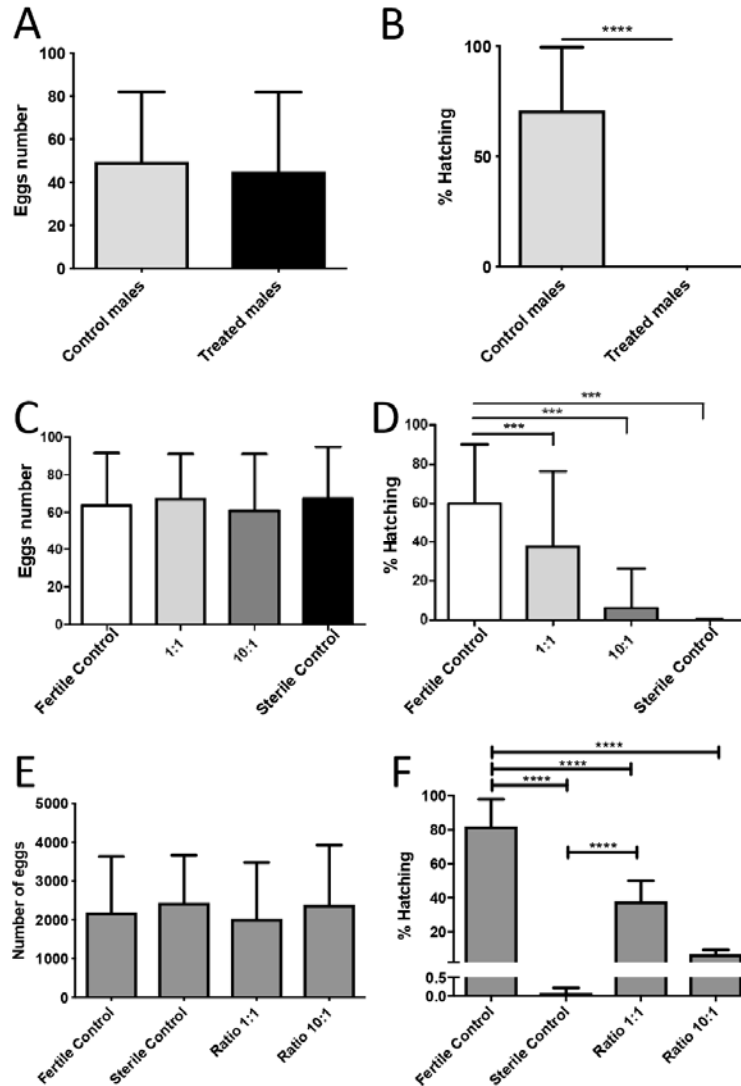

339

340 **Figure 2. Effect of sterility treatment on viable *Ae. aegypti* progeny and competitive capacity of**

341 **NVC mosquitoes. A and B.** Seven-days-old NVC (Treated males) or normal fertile males (Control

342 males) were allowed to mate with regular virgin females reared under similar laboratory conditions,

343 for three days. The females were blood fed and allowed to oviposit their eggs in individual

344 oviposition cages. Subsequently, the eggs were counted and hatched, in order to determine the

345 percentage of viable larvae. In Panel A the average number of eggs per female is shown, and Panel B

346 represents the percentage mean of viable larvae that hatched from the eggs. Data representative of 2

347 independent experiments. Statistical analysis: Unpaired t test, \*\*\*\* p < 0.0001. **C and D.**

348 Competitive capacity of NVC: Seven-days-old NVC were mixed with different ratios of fertile males



349 (only untreated males – fertile control; 1 NVC : 1 untreated male; 10 NVC : 1 untreated male and  
350 only NVC – sterile control) and allowed to mate with regular virgin females reared under similar  
351 laboratory conditions. Blood feeding, oviposition and hatching was performed as described in A.  
352 Panel C: the average number of eggs per female, and Panel D represents the percentage average of  
353 viable larvae that hatched from the eggs. Data on 2 independent experiments. Statistical analysis:  
354 One-way Anova, Tukey test, \*\*\*  $p < 0.005$ . **E and F.** Competitive competence of NVC in the semi-  
355 field trial. Different proportions of NVC and fertile male mosquitoes were placed in cages installed  
356 in a safe area in the city of Jacarezinho and allowed to mate with normal (fertile) virgin females,  
357 according to the protocol described in the Methods section. After the mate period, females from all  
358 groups were fed with blood and allowed to oviposit in appropriate containers placed inside the semi-  
359 field cages. The eggs were then removed from the cage, counted and hatched. E. Eggs average  
360 obtained in each experimental group from three independent experiments. F. Percentage of hatching  
361 (viable larvae derived from eggs) for each group (three experiments). Statistical analysis: One-way  
362 Anova (Tukey multiple comparison test, \*\*\*\*  $p < 0.0001$ .

363

### 364 **Large-scale releases of NVC male mosquitoes successfully suppressed a field *Ae. aegypti*** 365 **mosquito population**

366 The field study was carried out to demonstrate the efficacy of the method in suppressing the  
367 wild mosquito population.

368 Community outreach was started in Jacarezinho already back in 2017 (appendix S5), and  
369 NVC mosquitoes were released starting from September 2018 to mid-April 2019. As already  
370 mentioned, this city was chosen, among other reasons, for presenting a history of dengue epidemics.  
371 The abundance of *Ae. aegypti* in Jacarezinho was monitored throughout 2017 and early 2018. As  
372 expected, peaks of mosquito infestation were during the hottest and wettest months of the year (from  
373 November to March) (Figure 3A).

374

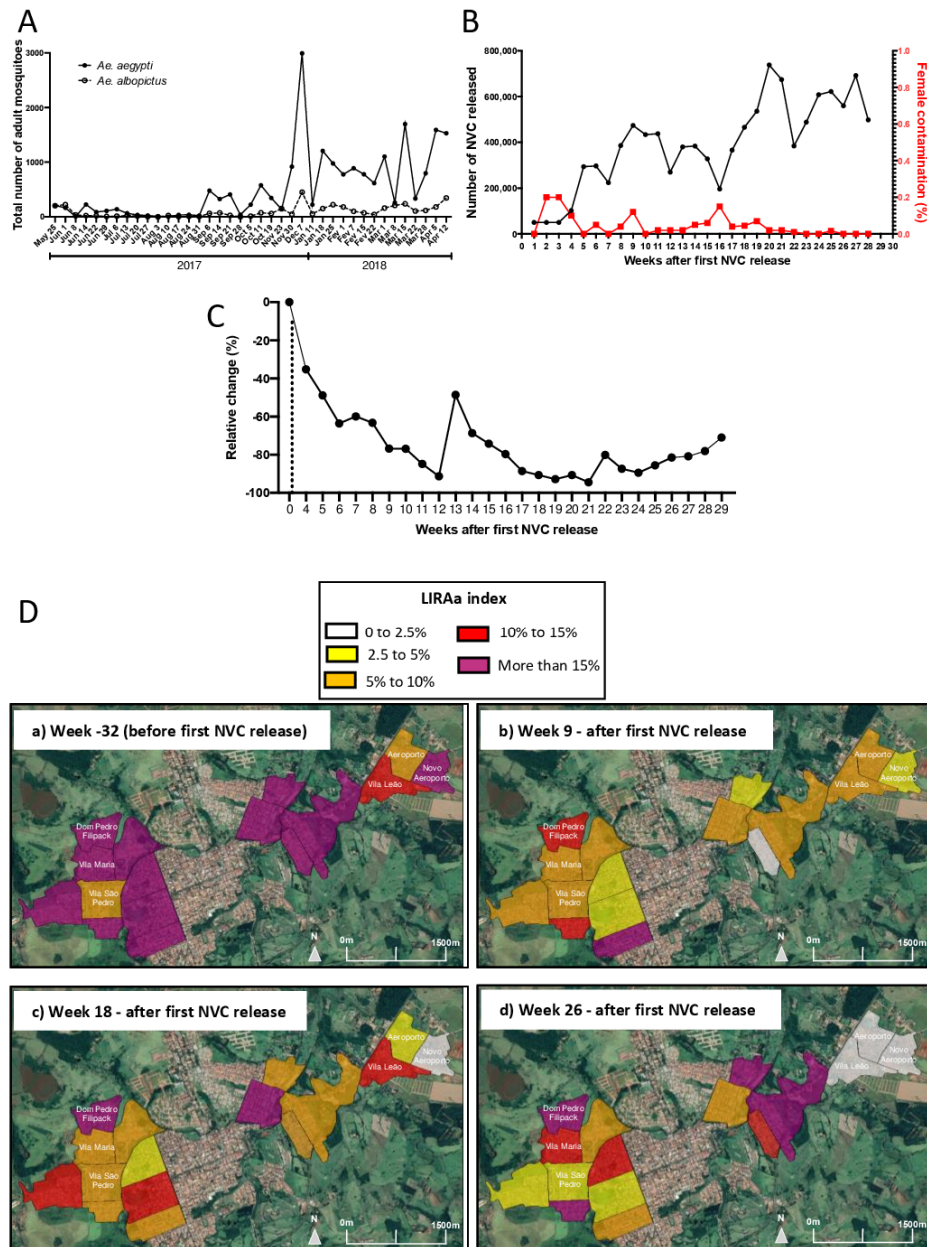

375

376 **Figure 3. Massive releases of NVC male mosquitoes suppressed the local *Ae. aegypti***

377 **population.** **A.** Abundance of mosquito population *Ae. aegypti* and *Ae. albopictus* in the city of

378 Jacarezinho from May 2017 until April 2018. Ovitrap were installed in 52 points distributed

379 throughout Jacarezinho town and replaced weekly. The eggs from each ovitrap were hatched

380 together and larvae were reared to adulthood. Adult mosquitoes were then identified by species. The

381 data show the total number of adult mosquitoes of each species per collection. **B.** Number of NVC

382 mosquitoes released at the treated area of Jacarezinho per week. The left Y axis (black) shows the  
383 absolute number of NVC mosquitoes released each week over the study period, while the right Y  
384 axis (red) shows the percentage of females present in the equivalent NVC release batch. **C.**  
385 Suppression of *Ae. aegypti* wild population in Jacarezinho after treatment with NVC mosquitoes.  
386 Weekly moving averages showing percentage change in *Ae. aegypti* abundance at the treated area,  
387 measured by mean number of larvae per trap relative to control area. **D.** Map of *Ae. aegypti* building  
388 infestation indices based on results of *Ae. aegypti* Infestation Index Rapid Survey (LIRAA) by  
389 neighborhood. *Ae. aegypti* infestation before the implementation of NVC program is shown in upper  
390 left panel **(a)**, and infestation 9 **(b)**, 18 **(c)** and 26 **(d)** weeks after the beginning of NVC releases.  
391 Data were provided by Epidemiological Surveillance of the Health Department of Paraná.  
392 Municipality of Jacarezinho, Paraná State, Brazil.

393

394 The total number of NVC male mosquitoes released during the intervention period was  
395 calculated to be 12,335,200 and the number of NVC male mosquitoes used in each release is shown  
396 in Figure 3B. It is important to emphasize that the intention is to release only males, and not female  
397 mosquitoes, since it is the females that bite and potentially potentiate the spread of dengue and/or  
398 other arboviruses. Even though female mosquitoes reared in Forrest Innovations' facility are  
399 pathogen-free, if released in enough numbers in an area where there is an ongoing epidemic, they  
400 could potentially contribute to local disease transmission. Therefore, each batch of sterile males  
401 underwent a quality control to detect the potential presence of contaminating females (Figure 3B).

402 Furthermore, to verify that NVC male mosquitoes remain viable and competitive after being  
403 released in the field, BG traps were installed in control and treated areas to recapture adult  
404 mosquitoes, including the NVC male mosquitoes. Although it is not possible to visually differentiate  
405 NVC mosquitoes from wild males, the fertility status showed that a high percentage of recaptured

406 males was sterile, indicating that NVC mosquitoes remain viable, yet sterile, in the field at least one  
407 week after release (appendix S6).

408 To quantify the suppression effect of NVC male mosquito releases on the *Ae. aegypti* field  
409 population we used the method of weekly moving averages [25]. According to the established  
410 confidence intervals, weekly moving averages showed that treatment with NVC male mosquitoes in  
411 the treated area reduced the field population up to 91.4% (week 21 after beginning of NVC releases)  
412 compared to the mosquito population of the control area (Figure 3C). Our results on suppression of  
413 the local mosquito population are in accordance with the official *Ae. aegypti* infestation data  
414 provided by sanitary surveillance authorities. This survey is carried out continuously by the Ministry  
415 of Health of all Brazilian cities and is based on LIRAA index [24]. LIRAA index expresses the  
416 percentage of buildings that were positive for the presence *Ae. aegypti* larvae. As can be seen in  
417 Figure 3D, which indicates the LIRAA index in some neighborhoods of Jacarezinho, high *Ae. aegypti*  
418 infestation rates were found in the both control and treated areas before implementation of the NVC  
419 male mosquito release program. Most of these neighborhoods presented LIRAA index above 5%, and  
420 in some of them LIRAA was above 15%. As defined by the Brazilian Ministry of Health, an index  
421 above 4% classifies the monitored area as being at imminent risk of a dengue outbreak. Remarkably,  
422 6 months after the beginning of the NVC releases, the treated area presented a drastic decrease in the  
423 rates of infestation of *Ae. aegypti* (from more than 15% to 0 – 2.5%), which placed these  
424 neighborhoods in a classification of a "satisfactory" situation. On the other hand, in neighborhoods  
425 of the control area, the LIRAA index continued to be extremely high and indicative of a risk of an  
426 imminent dengue outbreak, which indeed manifested in early March 2019. It is noteworthy that the  
427 neighborhoods immediately adjacent to the treated area also presented a high LIRAA index (more  
428 than 15%).

429

430 **Suppression of *Ae. aegypti* mosquito population by NVC males was associated with lower**  
431 **incidence of dengue in the treated area**

432 Both treated and control areas presented a high incidence of dengue cases in 2010, 2011 and  
433 2015 (Figure 4 A-C). In early March 2019 an outbreak of dengue began in Jacarezinho. During the  
434 period of NVC releases (from week 1 to 29, equivalent to October 3<sup>rd</sup>, 2018 and April 17, 2019,  
435 respectively), 293 confirmed dengue cases were reported in the entire city, and from this total, 109  
436 cases (37.2%) originated in neighborhoods of the control area. In contrast, only 8 cases of dengue  
437 (2.7%) were reported in the neighborhoods treated with NVC male mosquitoes (Figure 4, panels D  
438 and D'). The clustering of dengue cases in several locations in the control area, as well as the rapid  
439 weekly increase is indicative of a high level of local transmission by mosquitoes. In contrast, the 8  
440 cases reported in the treated area were sporadic and static during the period of NVC releases. On  
441 week 35, six weeks after the end of NVC male mosquitoes' releases (Figure 4, panel E and E') the  
442 accumulated number of dengue cases originated in the treated area remained much lower (16 cases)  
443 when compared to the control area (198 cases). As described in the Methods section, a blood sample  
444 for all the patients was collected to confirm the infection with dengue virus, both through serological  
445 and molecular analysis (RT-PCR Multiplex). The list of dengue cases based on their registered place  
446 of residence until the end of May, 2019 (week 35) can be found in appendix S7. In fact, the  
447 incidence of dengue in the control area during the entire period analyzed, from week 1 to 35 was  
448 4,360 cases per 100,000 inhabitants, while the incidence of dengue in the treated area, in the same  
449 period, was only 264 cases per 100,000 inhabitants, which is almost 16 times lower than the dengue  
450 incidence in the control area. The Rate Ratio, which is the ratio between dengue incidence of the  
451 treated area and the control area, was 0.0606 (95% CI 0.0364-0.1006), indicating that the treatment  
452 with NVC had a protective effect for residents of the treated area in terms of dengue. Corroborating  
453 this, ANCOVA analysis showed that the difference between dengue cases in treated and control  
454 areas was statistically significant (appendix S8).

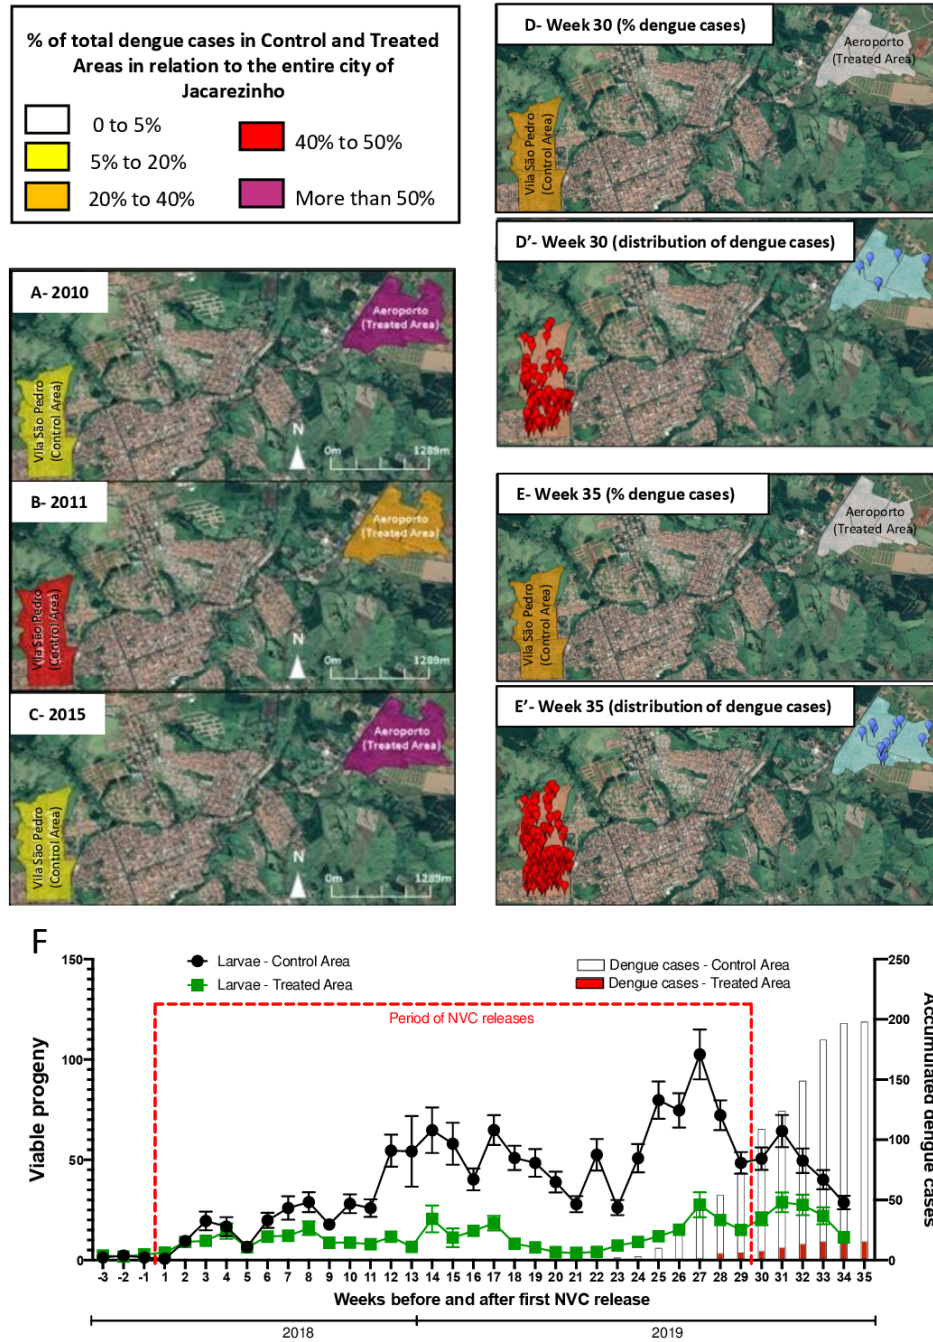

455

456 **Figure 4. Distribution of dengue cases in the treated area and control of the city of**  
 457 **Jacarezinho.** Maps **A** (2010), **B** (2011) and **C** (2015) refer to the period prior to the start of  
 458 treatment with NVC. Maps **D** and **D'** shows, respectively, the percentage of dengue cases and their  
 459 distribution in control and treated area on week 30 (April 24, 2019), approximately 7 months after  
 460 the start of NVC releases. Maps **E** and **E'** show, respectively, the percentage of dengue cases and

461 their distribution in control and treated areas in Jacarezinho on week 35(May 28, 2019), six weeks  
462 after the end of the NVC release period. On maps **D'** and **E'**, blue marks indicate the points where  
463 dengue cases were reported in the treated area and red marks the dengue cases reported in the  
464 control area. Data were provided by Epidemiological Surveillance of the Health Department of  
465 Paraná. Municipality of Jacarezinho, Paraná state, Brazil. **F.** Mean viable progeny per ovitrap and  
466 dengue cases in control and treated areas overtime. Control and treated areas were monitored through  
467 egg collection (ovitrap) over 37 weeks. Releases of NVC in the treated area occurred between  
468 September 28, 2018 and April 22, 2019 (weeks 1 to 29), on a weekly basis. Eggs collected from the  
469 control and treated areas were transferred to the laboratory, where they were hatched. The mean  
470 number of larvae derived from eggs of each ovitrap (100 for each area) over the 37 weeks is  
471 represented in left-Y axis and was defined as viable progeny. Statistical analysis: Analysis of  
472 Covariance provided a p-value <0.0001 for the difference between slopes for mean larvae per trap  
473 from control and treated areas. The cumulative number of confirmed cases of dengue in the control  
474 area (gray bars) and treated (red bars) were provided by the Parana Health Department and are  
475 shown on the Y axis on the right. The incidence of dengue in control area ( $I_{DC}$ ) was 4.36% (95% CI  
476 3.80%-4.99%) and in treated area ( $I_{DT}$ ) was 0.26% (95% CI 0.16%-0.43%). The Rate Ratio ( $I_{DT}/I_{DC}$   
477 is 0.0606 (95% CI 0.0364-0.1006). Both Linear Regression and Multivariate Anova (correlation  
478 between viable progeny in treated and control areas and dengue cases) provided p-values < 0.05.

479

480 Finally, two different statistical analysis were performed to demonstrate the direct correlation  
481 between the low incidence of dengue and the significant reduction in viable progeny of *Ae. aegypti*  
482 mosquitoes overtime, which resulted from the release of NVC male mosquitoes (Figure 4F). First, a  
483 linear regression analysis showed that the increase in the number of dengue cases is related both to  
484 the mean of eggs collected and viable larvae per week. For both study areas significant p values were  
485 obtained, in the control area  $p=4.551e-06$  and  $p=2.496e-06$  for eggs collected and viable larvae,

486 respectively. In the treated area  $p=1.824e-05$  and  $p=9.058e-07$  for eggs collected and viable larvae  
487 mean, respectively, evidencing the dependence between these variables (appendix S8). Then, a  
488 Multivariate Analysis (MANOVA) was performed to confirm this correlation (appendix S8). This  
489 analysis was based on mean number of viable larvae from eggs collected in the control and the  
490 treated areas during NVC releases and the number of dengue cases that originated in both areas in  
491 this period (Figure 4F). The analysis showed a strong influence of NVC treatment in reducing  
492 dengue cases ( $p$  value = 0.0025), which corroborates that the NVC releases has the potential to  
493 prevent dengue outbreaks (appendix S8).

494

## 495 **Discussion**

496 Jacarezinho is a town with about 40,000 inhabitants. It experienced several dengue outbreaks  
497 in the last decade, most notably in 2010, 2011 and 2015. The geographic distribution of dengue cases  
498 in those past epidemics shows that both the control and treated areas presented the greatest number  
499 of cases in the town, and that overall, the proportion of cases in the treated area was slightly higher  
500 (Figure 4A-C). We set out to perform our study by targeting these neighborhoods for the release of  
501 the NVC sterile mosquitoes starting in September 2018 (week 1). As is common in such real-world  
502 circumstances [13], it was not logistically possible to use statistical methods to predetermine sample  
503 sizes, to randomize the experiments or to blind the investigators.

504 The first case of dengue in Jacarezinho was confirmed in the beginning of March 2019 (week  
505 23) and the total number of cases increased until April 24<sup>th</sup> 2019 (week 29, end of the NVC male  
506 mosquito release period) with 293 confirmed dengue cases. Out of these, 109 cases were reported in  
507 the control region, whereas only 8 cases were reported in the treated area. This difference of more  
508 than 90% between the number of dengue cases in the treated and control areas continued even 6  
509 weeks after the total cessation of NVC male mosquito releases and demonstrates the success of our  
510 intervention program. During the last weeks of NVC male mosquito' releases (weeks 28 and 29), the



511 formal risk of dengue epidemic in Jacarezinho was declared by the local authorities, and by the end  
512 of May 2019 (week 35), a formal epidemic was confirmed, with 586 cases reported in total, 198 of  
513 which were in the control region (similar proportion of cases to past epidemics), whereas the treated  
514 region had only 16 cases (dramatically lower incidence compared with past epidemics). The details  
515 of the cases distribution are provided in appendix S7.

516 The data we present herein shows that an effective integrated SIT intervention plan can  
517 dramatically reduce the mosquito infestation of *Ae. aegypti*. Strikingly, the mosquito infestation  
518 index of the treated neighborhoods remained very low even though the directly adjacent  
519 neighborhoods were found to have very high mosquito indices in the LIRA survey. This underscores  
520 the robust nature of our NVC male mosquito intervention, since past studies have found significantly  
521 diminished effects of SIT in the "fringe areas" [13,15]. As such, allowing for such potential  
522 migration our suppression results become even more remarkable.

523 Critically, we have provided the first evidence that this new environmentally benign vector  
524 control intervention can potentially thwart the spread of a mosquito-borne disease epidemic. Our  
525 approach is based on the use sterile male mosquitoes (NVC) that are produced from a local mosquito  
526 strain and close collaboration with the local community and authorities.

527 With a dengue outbreak in the making, the local authorities could not ethically leave the  
528 control region without acting. Towards the end of March 2019, they began intervention in a series of  
529 reactive actions to try to thwart the outbreak and prevent an epidemic, including massive spraying of  
530 the organophosphate Malathion and 'blocking' (an intervention of seeking out larvae in breeding sites  
531 in a 100-meter radius around the infected case) of every resident dengue-case reported. This may  
532 have impacted the results and led to a certain reduction of the adult and subsequent larvae population  
533 in the control region (Figure 4F, weeks 27-29). Indeed, the incidence of dengue in the control area  
534 may have been even graver had the authorities not intervened at all. Due to the near absence of  
535 dengue cases in the treated area, no such reactive intervention was required. Our study directly

536 demonstrates that these highly common reactive measures that are utilized all over the world [26–29]  
537 were ineffective in preventing the continued spike in the number of dengue cases in the control  
538 region. Together, these data provide strong evidence that near prevention of dengue transmission in  
539 the treated area is exclusively due to NVC male mosquito releases.

540         Indeed, a recent review on management of mosquito resistance concluded that increases in  
541 insecticide resistance development in *Aedes* vectors as arbovirus epidemics proliferate underscore  
542 the urgency to create Insecticide Resistance Management (IRM) programs to maintain or recover  
543 vector control efficacy, and that when control strategies using insecticides are implemented, they  
544 should be systematically associated with noninsecticidal tools and, when possible, replaced by  
545 alternative tools to reduce the selection pressure on *Aedes* populations and limit the evolution of  
546 resistance [30]. Herein we provide a highly effective alternative tool to thwart the spread of *Aedes*  
547 resistance to insecticides.

548         With the lack of specific antiviral drugs to treat dengue as well as uncertainties about the  
549 efficacy and safety of the dengue vaccine [8,31], integrated vector control remains the main WHO  
550 recommendation for the near future [1]. It is thus striking that there is paucity of reliable evidence for  
551 the effectiveness of any alternative dengue vector control method. Specifically, of the plethora of  
552 SIT studies conducted to date, none was able to directly show a reduction in dengue incidence, and  
553 entomological indices alone were used as end points [11].

554         One of the key factors for successful SIT implementation for mosquito control is identifying  
555 a technology that induces sterility while at the same time retaining the sterilized treated males  
556 vigorous and capable of successfully competing with the endemic male population in the release  
557 area. Furthermore, in order to be implemented widely, such a method needs to be robust, cost-  
558 effective, easily scalable, and easy to implement in remote areas where it is most needed [32].  
559 Unfortunately, all the existing biological control alternatives have multiple limitations that make  
560 them unavailable for immediate globally impactful implementation (Table 2). For example, RIDL

561 mosquitoes have recently been shown not be self-limited, and surviving males have integrated their  
562 gene legacy into the local population [16], thus raising additional concerns beyond those that have  
563 prevented this intervention from being implemented. Indeed, 10 years since it was first tested in the  
564 Cayman Islands [33], there is still great difficulty in bypassing negative public sentiment to test it in  
565 the Florida Keys, and its operation in Brazil has almost ground to a halt. Population replacement  
566 strategies, such as the "Eliminate Dengue" program, based on *Wolbachia* inhibiting replication of  
567 viruses, showed some success in Australia [34], but scaling up this strategy seems daunting since  
568 there are multiple challenges to address such as the potential of the viruses to overcome *Wolbachia*-  
569 mediated "blocking" [17,35], reduced fitness of multiple strain *Wolbachia* carrying mosquitoes  
570 [17,36–38], and potential of high temperatures in some locales to constrain the ability of *Wolbachia*  
571 to invade natural mosquito populations and block disease transmission [17,38]. Recently, a combined  
572 IIT/SIT approach was hailed to almost eliminate mosquitoes using a *Wolbachia*-male + irradiated  
573 female contamination combination to facilitate population suppression. Notwithstanding the small  
574 size of the intervention areas and the large number of mosquitoes per area due to their reduced  
575 competitiveness, this method is very difficult to implement on a large scale, requiring backcrossing  
576 to local populations everywhere that it is implemented. Moreover, even under the very stringent  
577 conditions of the trial, several W<sub>Pi</sub> bearing females were recovered, underscoring the potential of  
578 limited population suppression inadvertently becoming population replacement once the scope of  
579 this kind of intervention is enlarged [13]. This is so because quality control for successful irradiation  
580 to the females is inevitably completed only after the batch was released.

1 **Table 2. Comparative analysis of the different methods for Vector control based on SIT, IIT or "blocking"**

| Method                                                                        | <i>SIT (irradiation)</i>                                                                                         | <i>Wolbachia</i> (IIT)                                                                   | <i>Wolbachia</i> + irradiation (IIT/SIT)                                                                                                   | <i>Wolbachia</i> (Transinfection - TI)                                                                         | Release of Insects carrying a Dominant Lethal (RIDL)                    | Natural Vector Control                                                                       |
|-------------------------------------------------------------------------------|------------------------------------------------------------------------------------------------------------------|------------------------------------------------------------------------------------------|--------------------------------------------------------------------------------------------------------------------------------------------|----------------------------------------------------------------------------------------------------------------|-------------------------------------------------------------------------|----------------------------------------------------------------------------------------------|
| <b>Details</b>                                                                | Release of irradiated-male mosquitoes                                                                            | Release of <i>Wolbachia</i> -infected males (Incompatible Insect Technique - IIT)        | Combined IIT/SIT (irradiated mosquitoes)                                                                                                   | Release of males and females infected with <i>Wolbachia</i> (Blocking of virus transmission)                   | Release of transgenic mosquitoes (OX513A)                               | Release of NVC sterile male mosquitoes                                                       |
| <b>Field trial</b>                                                            | Bellini et al., 2013[39]                                                                                         | Mains et al., 2019[15]                                                                   | Zheng et al., 2019[13]                                                                                                                     | Hoffmann et al., 2011[34]                                                                                      | Carvalho et al. 2015[14]                                                | Present Study                                                                                |
| <b>City</b>                                                                   | Emilia-Romagna region (five small towns), northern Italy                                                         | South Miami, FL, USA                                                                     | Guanzhou, China                                                                                                                            | Cairns, Australia                                                                                              | Juazeiro, Bahia, Brazil                                                 | Jacarezinho, Parana, Brazil                                                                  |
| <b>Treated Area</b>                                                           | 112 ha                                                                                                           | 170 ha                                                                                   | 32.5 ha                                                                                                                                    | Not Informed                                                                                                   | 11 ha                                                                   | 77 ha                                                                                        |
| <b>Period of releases</b>                                                     | 3 years                                                                                                          | 6 months                                                                                 | 2 years                                                                                                                                    | 10 weeks                                                                                                       |                                                                         | 7 months                                                                                     |
| <b>Mosquitoes released</b>                                                    | 2 M                                                                                                              | 6.8 M                                                                                    | 197.1M                                                                                                                                     | 300,000 adults                                                                                                 | 185,000 males                                                           | 12.3M                                                                                        |
| <b>Field monitoring</b>                                                       | 85 ovitraps                                                                                                      | 70 ovitraps and 35 BGs                                                                   | 150 ovitraps and 60 BGs                                                                                                                    | 320 ovitraps                                                                                                   | 120 ovitraps and BGs (amount not informed)                              | 100 ovitraps and 20 BGs                                                                      |
| <b><i>Ae. aegypti</i> population reduction relative to control</b>            | Induced up to 68% sterility in the native population (eggs' hatching %). No direct demonstration of suppression. | Up to 78% in the center<br>Max 45% in the "edge" areas                                   | Up to 94%                                                                                                                                  | Successful fixation of <i>Wolbachia</i> in local mosquito population occurred after 11 weeks of releases       | Successful suppression of field population (81-95%)                     | Up to 91% throughout                                                                         |
| <b>% female contamination</b>                                                 | Not informed                                                                                                     | Not informed                                                                             | 0.6%                                                                                                                                       | Not applicable                                                                                                 | 0.02%                                                                   | 0.003%                                                                                       |
| <b>Reduction in the number of dengue cases</b>                                | Not evaluated                                                                                                    | Not evaluated                                                                            | Not evaluated                                                                                                                              | Not evaluated                                                                                                  | Not evaluated                                                           | 93% less (220 cases in the control area and only 16 cases in treated area – until June 2019) |
| <b>Risk of introduction of new organisms/ genes/ residues into the nature</b> | Low efficiency of sterilization by irradiation results in the release of large numbers of fertile males          | High (undesired <i>Wolbachia</i> introduction into natural mosquito populations [17,40]) | Medium (sterilization by irradiation did not prevented completely undesired introduction of <i>Wolbachia</i> into natural population) [13] | High (introduction of <i>Wolbachia</i> into natural mosquito population is the basis of this method)           | High (not self-limited: spread of transgene to natural population [16]) | No risk                                                                                      |
| <b>Impact on mosquito fitness or competitive capacity</b>                     | High                                                                                                             | High, depending on the <i>Wolbachia</i> strain [17,41,42]                                | High [43]                                                                                                                                  | High, depending on the <i>Wolbachia</i> strain [17]                                                            | High [44]                                                               | No impact, sterile males are produced from local mosquito population                         |
| <b>Long-term efficacy</b>                                                     | Need to perform additional releases in the subsequent mosquito seasons                                           | Need to perform additional releases in the subsequent mosquito seasons                   | Need to perform additional releases in the subsequent mosquito seasons                                                                     | Need to periodically check for the presence of <i>Wolbachia</i> in field-recaptured mosquitoes from field [17] | Need to perform additional releases in the subsequent mosquito seasons  | Need to perform additional releases in the subsequent mosquito seasons                       |

|                            |                                                                                                                                                      |                                                                                                                                    |                                                                                                                                                                                    |                                                                                                                                                                                                                                                                                                                           |                                                                                                                                                                                                                         |                                                                                                                                                                                                                                                 |
|----------------------------|------------------------------------------------------------------------------------------------------------------------------------------------------|------------------------------------------------------------------------------------------------------------------------------------|------------------------------------------------------------------------------------------------------------------------------------------------------------------------------------|---------------------------------------------------------------------------------------------------------------------------------------------------------------------------------------------------------------------------------------------------------------------------------------------------------------------------|-------------------------------------------------------------------------------------------------------------------------------------------------------------------------------------------------------------------------|-------------------------------------------------------------------------------------------------------------------------------------------------------------------------------------------------------------------------------------------------|
| <b>Additional comments</b> | Because irradiated males presented lower competitiveness capacity they are not the first choice for SIT programs.                                    | Poor competitive capacity implies the need to release greater amounts of males<br><br>High cost program (reviewed in [17])         | Poor competitive capacity implies the need to release greater amounts of males<br><br>High cost program: difficult to implement in large-scale due the irradiation process [17,43] | Potential loss of infected mosquito population decreases the effectiveness of virus blocking (reviewed in [17])<br><br>Risk of selecting resistant and more virulent strain of virus [17,45]<br><br>Evolutionary changes in host genome resulting in reduced virus blocking even in the presence of <i>Wolbachia</i> [17] | Historic public rejection, lack of support from authorities, long and difficult regulatory process associated to use of GM mosquitoes and the recently shown gene flow from GM mosquitoes into the local gene pool [16] | Only one field trial performed so far                                                                                                                                                                                                           |
| <b>Conclusions</b>         | Medium efficacy. Recently this technique has been used in combination with other techniques, which involves additional costs for the program.[13,46] | Medium efficacy demonstrated, however the risk of undesired introduction of <i>Wolbachia</i> is a strong limitation of the method. | High efficacy when males are released in great amounts                                                                                                                             | Effective at least in a short-term, but effects of introduction of <i>Wolbachia</i> at long-term is not known so far.                                                                                                                                                                                                     | Although mosquito suppression is effective, the potential environmental impact, the history of public rejection and lack of support from the authorities difficult implementation of this method.                       | High effective reduction in the natural mosquito population; Dramatic reduction in number of dengue cases. No environmental impact: self-limited mosquitoes; no risk of introduction of new mosquito strains, genes, residues into environment. |

582           The process described herein to induce male sterility in *Ae. aegypti* overcomes all the  
583 technological, logistical and ecological hurdles described above, as well as successfully addressing  
584 regulatory compliance and the public concerns. We developed a treatment that is transient in nature  
585 and the active ingredients do not persist in the released adult mosquito [47] (appendix S9). By  
586 collecting thousands of local mosquito eggs before the start of the project, we were able to use the  
587 ambient mosquito genepool to guarantee that the local climate adaptation and local female seeking  
588 capabilities of the released sterile males will be optimal. By creating a colony with hundreds of  
589 "founders" and thus large genetic variability, we were able to ensure that the males were highly  
590 competitive and survived at least one week after their release.

591           In addition, as has been determined in previous studies, the education and involvement of the  
592 community in decision making provides a crucial component in successful implementation of SIT  
593 programs. A bottom-up approach that targets school workshops, community programs and total  
594 transparency, was highly successful in exposing the people to the benefits of releasing sterile male  
595 mosquitoes (appendix S5).

596           Dengue outbreaks are highly unpredictable, but it has been empirically determined in several  
597 previous studies that a minimum mosquito-vector threshold is needed to facilitate the spread of the  
598 virus in the population. Gradual mosquito population suppression all the way to over 91.4%  
599 reduction from the control area that was demonstrated in this study shows the importance of  
600 sustaining a continuous release program that is dependent on real-time monitoring of the mosquito  
601 population. Concurrent programs run over large regions may well bring total relief from *Aedes*-  
602 related diseases by the second year of implementation.

603           The dramatic influence on the incidence of malaria by the deployment of Pyrethroid-treated  
604 bed nets underscores the ability of the international health community and Non-Governmental  
605 Organizations to mobilize in order to take advantage of an effective system to reduce disease.  
606 However, these efforts require the massive integrated coordinated action and funding of nations and

607 public organizations such as the Bill and Melinda Gates Foundation in order to be effectively  
608 disseminated. In order to create real impact on a global scale, local communities need to be  
609 empowered to set up the infrastructure for them to be able to endorse the transformative paradigm  
610 that is described herein. It is our humble hope that this communication will be the trigger for such  
611 global mobilization to further test and subsequently employ NVC male mosquitoes wherever the  
612 threat of dengue and other arboviral diseases is significant.

613

## 614 **References**

- 615 1. Wilder-Smith A, Ooi E-E, Horstick O, Wills B. Dengue. *The Lancet*. 2019;393: 350–363.  
616 doi:10.1016/S0140-6736(18)32560-1
- 617 2. World Health Organization. Global vector control response 2017-2030. New ed. Special  
618 Programme for Research and Training in Tropical Diseases, editor. Geneva: TDR: World  
619 Health Organization; 2017.
- 620 3. Special Programme for Research and Training in Tropical Diseases, World Health  
621 Organization, editors. Dengue: guidelines for diagnosis, treatment, prevention, and control.  
622 New ed. Geneva: TDR: World Health Organization; 2009.
- 623 4. Araújo H, Carvalho D, Ioshino R, Costa-da-Silva A, Capurro M. *Aedes aegypti* Control  
624 Strategies in Brazil: Incorporation of New Technologies to Overcome the Persistence of  
625 Dengue Epidemics. *Insects*. 2015;6: 576–594. doi:10.3390/insects6020576
- 626 5. Rocklöv J, Quam MB, Sudre B, German M, Kraemer MUG, Brady O, et al. Assessing Seasonal  
627 Risks for the Introduction and Mosquito-borne Spread of Zika Virus in Europe. *EBioMedicine*.  
628 2016;9: 250–256. doi:10.1016/j.ebiom.2016.06.009
- 629 6. Struchiner CJ, Rocklöv J, Wilder-Smith A, Massad E. Increasing Dengue Incidence in  
630 Singapore over the Past 40 Years: Population Growth, Climate and Mobility. Chowell G,  
631 editor. *PLOS ONE*. 2015;10: e0136286. doi:10.1371/journal.pone.0136286
- 632 7. Wilder-Smith A, Ooi E-E, Vasudevan SG, Gubler DJ. Update on Dengue: Epidemiology, Virus  
633 Evolution, Antiviral Drugs, and Vaccine Development. *Curr Infect Dis Rep*. 2010;12: 157–164.  
634 doi:10.1007/s11908-010-0102-7
- 635 8. Hadinegoro SR, Arredondo-García JL, Capeding MR, Deseda C, Chotpitayasunondh T, Dietze  
636 R, et al. Efficacy and Long-Term Safety of a Dengue Vaccine in Regions of Endemic Disease.  
637 *N Engl J Med*. 2015;373: 1195–1206. doi:10.1056/NEJMoa1506223
- 638 9. Souza-Neto JA, Powell JR, Bonizzoni M. *Aedes aegypti* vector competence studies: A review.  
639 *Infect Genet Evol*. 2019;67: 191–209. doi:10.1016/j.meegid.2018.11.009
- 640 10. Hemingway J. Resistance: A problem without an easy solution. *Pestic Biochem Physiol*.  
641 2018;151: 73–75. doi:10.1016/j.pestbp.2018.08.007
- 642 11. Benelli G, Jeffries CL, Walker T. Biological Control of Mosquito Vectors: Past, Present, and  
643 Future. *Insects*. 2016;7. doi:10.3390/insects7040052
- 644 12. Oliva CF, Jacquet M, Gilles J, Lemperiere G, Maquart P-O, Quilici S, et al. The Sterile Insect  
645 Technique for Controlling Populations of *Aedes albopictus* (Diptera: Culicidae) on Reunion  
646 Island: Mating Vigour of Sterilized Males. Brooke B, editor. *PLoS ONE*. 2012;7: e49414.  
647 doi:10.1371/journal.pone.0049414

- 648 13. Zheng X, Zhang D, Li Y, Yang C, Wu Y, Liang X, et al. Incompatible and sterile insect  
649 techniques combined eliminate mosquitoes. *Nature*. 2019;572: 56–61. doi:10.1038/s41586-019-  
650 1407-9
- 651 14. Carvalho DO, McKemey AR, Garziera L, Lacroix R, Donnelly CA, Alphey L, et al.  
652 Suppression of a Field Population of *Aedes aegypti* in Brazil by Sustained Release of  
653 Transgenic Male Mosquitoes. *PLoS Negl Trop Dis*. 2015;9: e0003864.  
654 doi:10.1371/journal.pntd.0003864
- 655 15. Mains JW, Kelly PH, Dobson KL, Petrie WD, Dobson SL. Localized Control of *Aedes aegypti*  
656 (Diptera: Culicidae) in Miami, FL, via Inundative Releases of Wolbachia-Infected Male  
657 Mosquitoes. *J Med Entomol*. 2019;56: 1296–1303. doi:10.1093/jme/tjz051
- 658 16. Evans BR, Kotsakiozi P, Costa-da-Silva AL, Ioshino RS, Garziera L, Pedrosa MC, et al.  
659 Transgenic *Aedes aegypti* Mosquitoes Transfer Genes into a Natural Population. *Sci Rep*.  
660 2019;9: 13047. doi:10.1038/s41598-019-49660-6
- 661 17. Ritchie SA, van den Hurk AF, Smout MJ, Staunton KM, Hoffmann AA. Mission  
662 Accomplished? We Need a Guide to the ‘Post Release’ World of Wolbachia for *Aedes* -borne  
663 Disease Control. *Trends Parasitol*. 2018;34: 217–226. doi:10.1016/j.pt.2017.11.011
- 664 18. Calvitti M, Marini F, Desiderio A, Puggioli A, Moretti R. Wolbachia density and cytoplasmic  
665 incompatibility in *Aedes albopictus*: concerns with using artificial Wolbachia infection as a  
666 vector suppression tool. *PloS One*. 2015;10: e0121813. doi:10.1371/journal.pone.0121813
- 667 19. Rutledge L, Ward R, Gould D. Studies on the feeding response of mosquitoes to nutritive  
668 solutions in a new membrane feeder. *Mosq News*. 1964;24: 407–419.
- 669 20. Robida MD, Singh R. *Drosophila* polypyrimidine-tract binding protein (PTB) functions  
670 specifically in the male germline. *EMBO J*. 2003;22: 2924–2933. doi:10.1093/emboj/cdg301
- 671 21. Sharma VP, Patterson RS, Grover KK, LaBrecque GC. Chemosterilization of the tropical house  
672 mosquito *Culex pipiens fatigans* Wied.: laboratory and field cage studies. *Bull World Health*  
673 *Organ*. 1973;48: 45–48.
- 674 22. Catteruccia F, Crisanti A, Wimmer EA. Transgenic technologies to induce sterility. *Malar J*.  
675 2009;8 Suppl 2: S7. doi:10.1186/1475-2875-8-S2-S7
- 676 23. Atkinson MP, Su Z, Alphey N, Alphey LS, Coleman PG, Wein LM. Analyzing the control of  
677 mosquito-borne diseases by a dominant lethal genetic system. *Proc Natl Acad Sci U S A*.  
678 2007;104: 9540–9545. doi:10.1073/pnas.0610685104
- 679 24. Lagrotta MTF, Silva W da C, Souza-Santos R. Identification of key areas for *Aedes aegypti*  
680 control through geoprocessing in Nova Iguaçu, Rio de Janeiro State, Brazil. *Cad Saude Publica*.  
681 2008;24: 70–80. doi:10.1590/s0102-311x2008000100007
- 682 25. Gorman K, Young J, Pineda L, Márquez R, Sosa N, Bernal D, et al. Short-term suppression of  
683 *Aedes aegypti* using genetic control does not facilitate *Aedes albopictus*. *Pest Manag Sci*.  
684 2016;72: 618–628. doi:10.1002/ps.4151
- 685 26. World Health Organization. Global strategy for dengue prevention and control, 2012-2020.  
686 Geneva, Switzerland: World Health Organization; 2012. Available:  
687 [http://apps.who.int/iris/bitstream/10665/75303/1/9789241504034\\_eng.pdf](http://apps.who.int/iris/bitstream/10665/75303/1/9789241504034_eng.pdf)
- 688 27. Esu E, Lenhart A, Smith L, Horstick O. Effectiveness of peridomestic space spraying with  
689 insecticide on dengue transmission; systematic review. *Trop Med Int Health*. 2010 [cited 17 Oct  
690 2019]. doi:10.1111/j.1365-3156.2010.02489.x
- 691 28. Stoops CA, Qualls WA, Nguyen T-VT, Richards SL. A Review of Studies Evaluating  
692 Insecticide Barrier Treatments for Mosquito Control From 1944 to 2018. *Environ Health*  
693 *Insights*. 2019;13: 117863021985900. doi:10.1177/1178630219859004
- 694 29. Horstick O, Boyce R, Runge-Ranzinger S. Building the evidence base for dengue vector  
695 control: searching for certainty in an uncertain world. *Pathog Glob Health*. 2018;112: 395–403.  
696 doi:10.1080/20477724.2018.1547541



- 697 30. Dusfour I, Vontas J, David J-P, Weetman D, Fonseca DM, Corbel V, et al. Management of  
698 insecticide resistance in the major Aedes vectors of arboviruses: Advances and challenges.  
699 Fuehrer H-P, editor. PLoS Negl Trop Dis. 2019;13: e0007615.  
700 doi:10.1371/journal.pntd.0007615
- 701 31. Aguiar M, Stollenwerk N, Halstead SB. The risks behind Dengvaxia recommendation. Lancet  
702 Infect Dis. 2016;16: 882–883. doi:10.1016/S1473-3099(16)30168-2
- 703 32. Alphey L, Benedict M, Bellini R, Clark GG, Dame DA, Service MW, et al. Sterile-insect  
704 methods for control of mosquito-borne diseases: an analysis. Vector Borne Zoonotic Dis  
705 Larchmt N. 2010;10: 295–311. doi:10.1089/vbz.2009.0014
- 706 33. Harris AF, McKemey AR, Nimmo D, Curtis Z, Black I, Morgan SA, et al. Successful  
707 suppression of a field mosquito population by sustained release of engineered male mosquitoes.  
708 Nat Biotechnol. 2012;30: 828–830. doi:10.1038/nbt.2350
- 709 34. Hoffmann AA, Montgomery BL, Popovici J, Iturbe-Ormaetxe I, Johnson PH, Muzzi F, et al.  
710 Successful establishment of Wolbachia in Aedes populations to suppress dengue transmission.  
711 Nature. 2011;476: 454–457. doi:10.1038/nature10356
- 712 35. Ford SA, Allen SL, Ohm JR, Sigle LT, Sebastian A, Albert I, et al. Selection on Aedes aegypti  
713 alters Wolbachia-mediated dengue virus blocking and fitness. Nat Microbiol. 2019.  
714 doi:10.1038/s41564-019-0533-3
- 715 36. Nguyen TH, Nguyen HL, Nguyen TY, Vu SN, Tran ND, Le TN, et al. Field evaluation of the  
716 establishment potential of wMelPop Wolbachia in Australia and Vietnam for dengue control.  
717 Parasit Vectors. 2015;8: 563. doi:10.1186/s13071-015-1174-x
- 718 37. Axford JK, Ross PA, Yeap HL, Callahan AG, Hoffmann AA. Fitness of wAlbB Wolbachia  
719 Infection in Aedes aegypti: Parameter Estimates in an Outcrossed Background and Potential for  
720 Population Invasion. Am J Trop Med Hyg. 2016;94: 507–516. doi:10.4269/ajtmh.15-0608
- 721 38. Ross PA, Endersby NM, Hoffmann AA. Costs of Three Wolbachia Infections on the Survival  
722 of Aedes aegypti Larvae under Starvation Conditions. PLoS Negl Trop Dis. 2016;10:  
723 e0004320. doi:10.1371/journal.pntd.0004320
- 724 39. Bellini R, Medici A, Puggioli A, Balestrino F, Carrieri M. Pilot field trials with Aedes  
725 albopictus irradiated sterile males in Italian urban areas. J Med Entomol. 2013;50: 317–325.  
726 doi:10.1603/me12048
- 727 40. Boyer S, Toty C, Jacquet M, Lempérière G, Fontenille D. Evidence of multiple inseminations  
728 in the field in Aedes albopictus. PloS One. 2012;7: e42040. doi:10.1371/journal.pone.0042040
- 729 41. Chambers EW, Hapairai L, Peel BA, Bossin H, Dobson SL. Male mating competitiveness of a  
730 Wolbachia-introgressed Aedes polynesiensis strain under semi-field conditions. PLoS Negl  
731 Trop Dis. 2011;5: e1271. doi:10.1371/journal.pntd.0001271
- 732 42. Segoli M, Hoffmann AA, Lloyd J, Omodei GJ, Ritchie SA. The effect of virus-blocking  
733 Wolbachia on male competitiveness of the dengue vector mosquito, Aedes aegypti. PLoS Negl  
734 Trop Dis. 2014;8: e3294. doi:10.1371/journal.pntd.0003294
- 735 43. Atyame CM, Labbé P, Lebon C, Weill M, Moretti R, Marini F, et al. Comparison of Irradiation  
736 and Wolbachia Based Approaches for Sterile-Male Strategies Targeting Aedes albopictus.  
737 López-Martínez G, editor. PLOS ONE. 2016;11: e0146834. doi:10.1371/journal.pone.0146834
- 738 44. Massonnet-Bruneel B, Corre-Catelin N, Lacroix R, Lees RS, Hoang KP, Nimmo D, et al.  
739 Fitness of transgenic mosquito Aedes aegypti males carrying a dominant lethal genetic system.  
740 PloS One. 2013;8: e62711. doi:10.1371/journal.pone.0062711
- 741 45. Bull JJ, Turelli M. Wolbachia versus dengue. Evol Med Public Health. 2013;2013: 197–207.  
742 doi:10.1093/emph/eot018
- 743 46. Lees RS, Gilles JR, Hendrichs J, Vreysen MJ, Bourtzis K. Back to the future: the sterile insect  
744 technique against mosquito disease vectors. Curr Opin Insect Sci. 2015;10: 156–162.  
745 doi:10.1016/j.cois.2015.05.011

746 47. Gato R, Companioni A, Bruzón RY, Menéndez Z, González A, Rodríguez M. Release of  
747 thiotepa sterilized males into caged populations of *Aedes aegypti*: life table analysis. *Acta Trop.*  
748 2014;132 Suppl: S164-169. doi:10.1016/j.actatropica.2013.09.024

749

750 **Supporting information captions**

751

752 Appendix S1– Fertility bioassay

753 Appendix S2– Semi-field trial design

754 Appendix S3– Local Ethic Approval

755 Appendix S4– Agreement form for installation of ovitraps

756 Appendix S5– Community outreach and educational program

757 Appendix S6– Evaluation of NVC viability after release

758 Appendix S7– Dengue cases distribution

759 Appendix S8– Statistical analysis

760 Appendix S9– Residues analysis

761
